# Supplementary material for: Highly promoted electrocatalytic activity of spinel CoFe2O4 by combining with Er0.4Bi1.6O3 as a bifunctional oxygen electrode for reversible solid oxide cells
Source: Royal Society of Chemistry journal article supplement (doi:10.1039/d1ta07494f), 2021-12-20
Supplement: d1ta07494f1.pdf [file d1ta07494f1.pdf]

## Supporting Information

### **Highly Promoted Electrocatalytic Activity of Spinel $\text{CoFe}_2\text{O}_4$ by Combination with $\text{Er}_{0.4}\text{Bi}_{1.6}\text{O}_3$ as a Bifunctional Oxygen Electrode for Reversible Solid Oxide Cells**

Doyeub Kim<sup>a,†</sup>, Imdadullah Thaheem<sup>b,†</sup>, Hyeongmin Yu<sup>a</sup>, Jeong Hwa Park<sup>b</sup>, and Kang Taek Lee<sup>a,\*</sup>

<sup>a</sup>*Department of Mechanical Engineering, KAIST, Daejeon, 34141, Republic of Korea*

<sup>b</sup>*Department of Energy Science and Engineering, DGIST, Daegu 42988, Republic of Korea*

<sup>†</sup> Equally contributed to this work

\* Corresponding Authors: leekt@kaist.ac.kr

#### **Contents:**

**Table. S1, Fig. S1-S8**

**Table S1.** Elementary ORR processes and their corresponding reaction orders

| Elementary reaction      |                                                             | Reaction order ( $n$ ) | Ref.   |
|--------------------------|-------------------------------------------------------------|------------------------|--------|
| Dissociative adsorption  | $O_{2(g)} \leftrightarrow 2O_{ad}$                          | $\sim 1$               | [1, 2] |
| Charge transfer          | $O_{ad} + e^- \leftrightarrow O_{ad}^-$                     | $\sim 3/8$             | [2, 3] |
| Surface diffusion        | $O_{ad}^- \leftrightarrow O_{TPB}^-$                        | $\sim 1/4$             | [1, 3] |
| Charge transfer at TPBs  | $O_{TPB}^- + e^- \leftrightarrow O_{TPB}^{2-}$              | $\sim 1/8$             | [3]    |
| Oxygen ion incorporation | $O_{TPB}^{2-} + V_O^{\bullet\bullet} \leftrightarrow O_O^X$ | $\sim 0$               | [1, 3] |

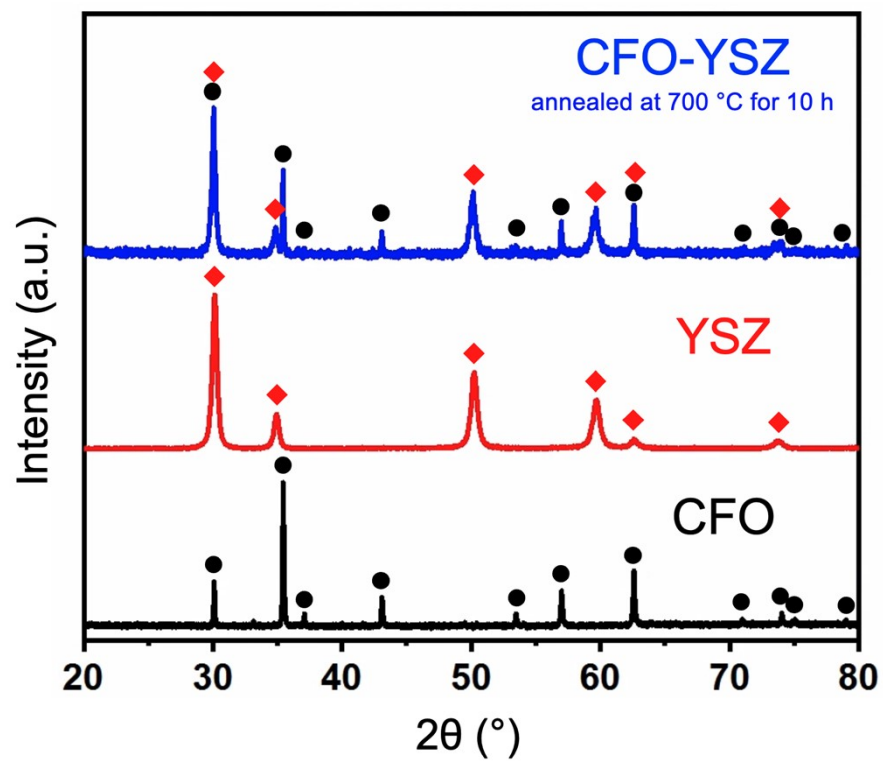

**Figure. S1** XRD patterns of a mixture of the CFO and YSZ powders after heat-treatment a 700 °C for 10 h under ambient air.

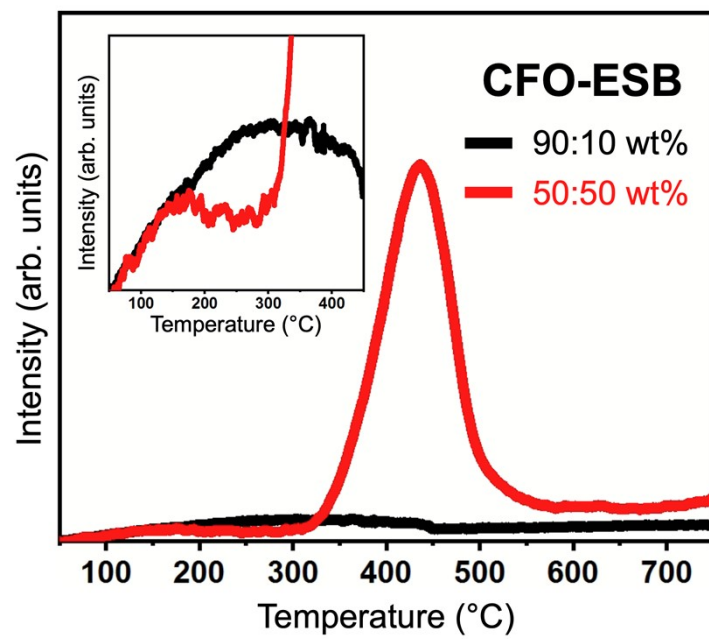

**Figure. S2** Comparison of O<sub>2</sub>-TPD profiles of CFO-ESB samples.

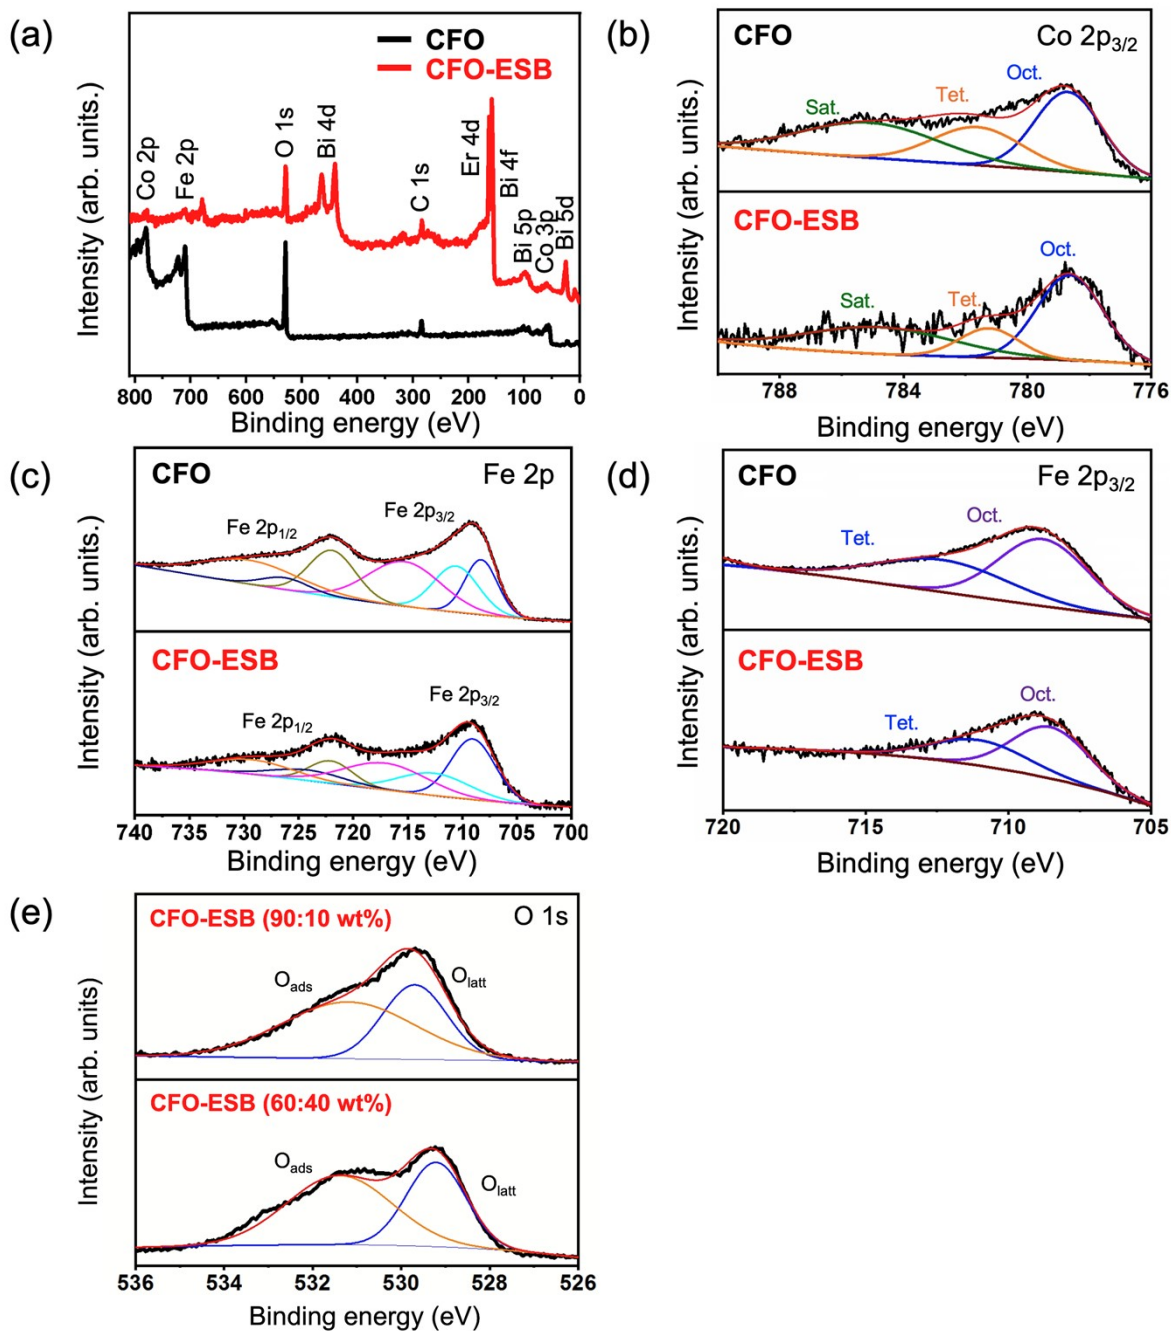

**Figure. S3** (a) survey spectra, (b) Co 2p<sub>3/2</sub>, (c) Fe 2p, and (d) Fe 2p<sub>3/2</sub> core-level XPS spectra of CFO and CFO-ESB samples, respectively. (e) Comparison of O 1s core-level XPS spectra of CFO-ESB mixtures with different ratios.

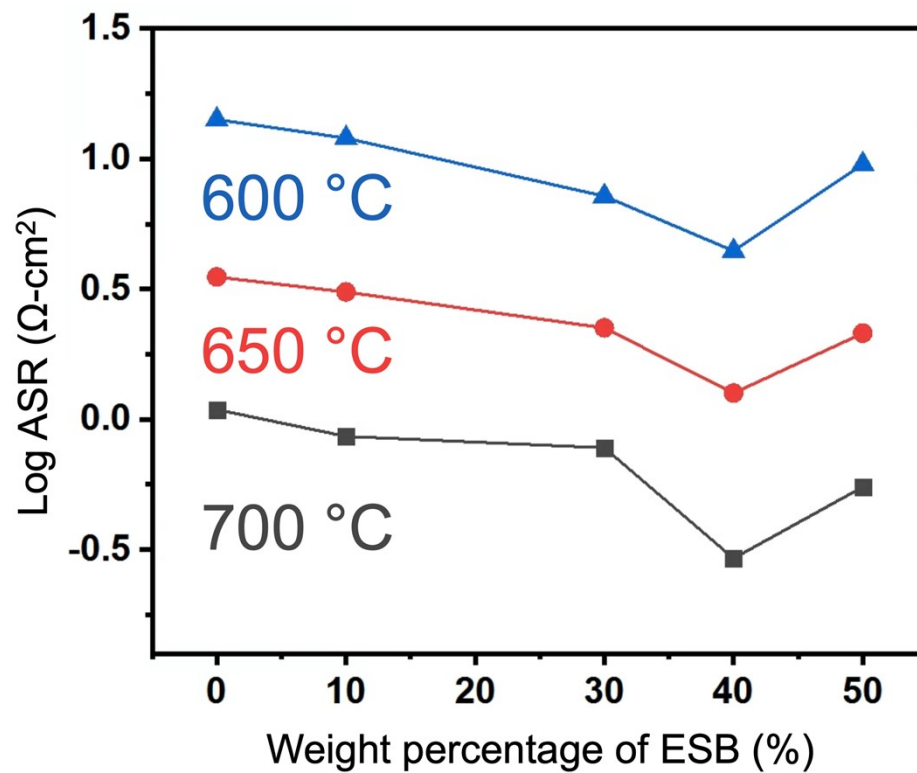

**Figure. S4** Relationship between the ASR values with the weight percentage of ESB for the CFO-ESB electrode.

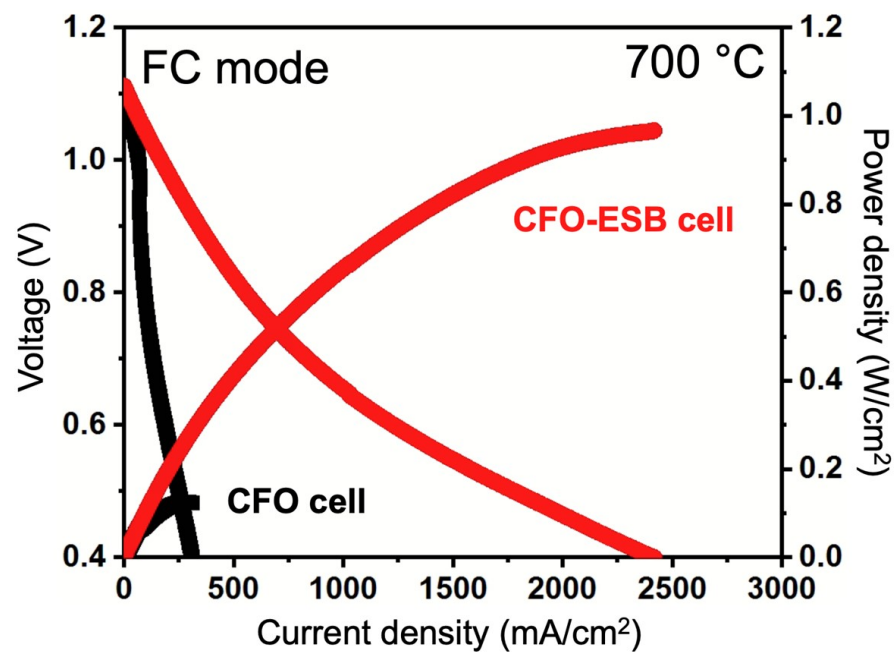

**Figure. S5** Comparison of  $I$ - $V$ - $P$  curves of CFO and CFO-ESB cells measured at 700 °C under FC mode.

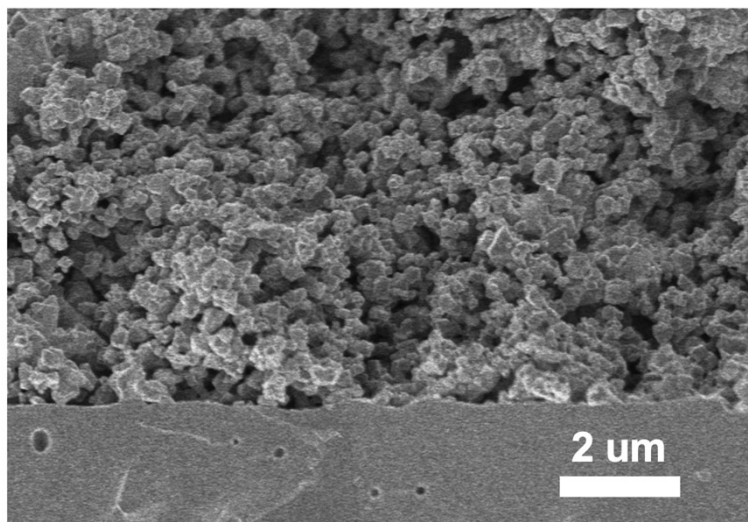

**Figure. S6** A cross-sectional SEM image of the CFO-ESB cell after durability test

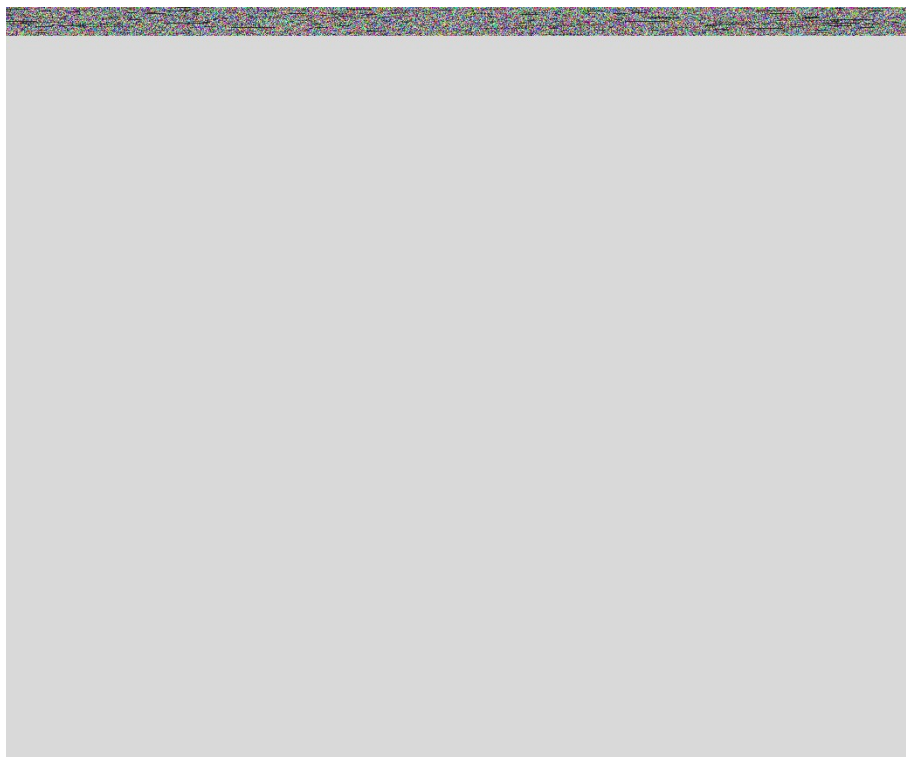

**Figure. S7** Comparison of  $I$ - $V$  curves of CFO and CFO-ESB cells measured at 700 °C under EC mode

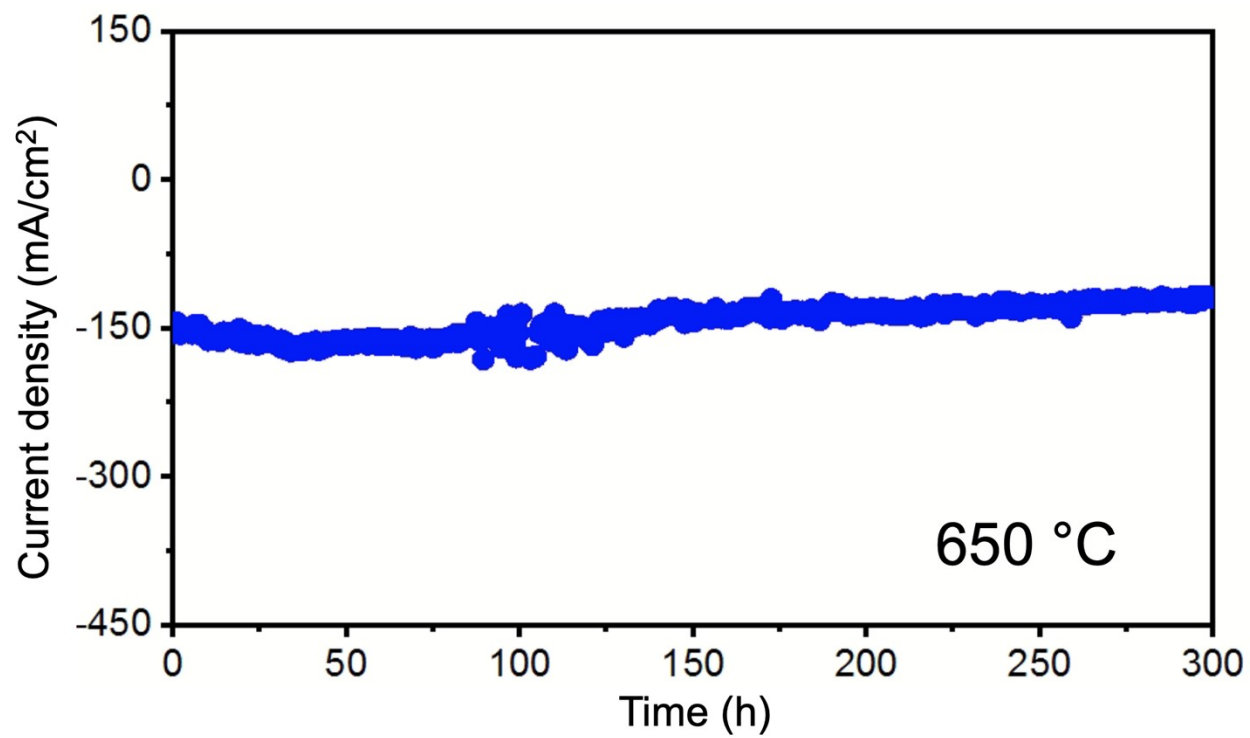

**Figure. S8** Durability of CFO-ESB cell at a constant voltage of 1.3 V at 650 °C with 20% steam concentration under EC mode.

## References

- [1] Kim D, Park JW, Chae MS, Jeong I, Park JH, Kim KJ, et al. An efficient and robust lanthanum strontium cobalt ferrite catalyst as a bifunctional oxygen electrode for reversible solid oxide cells. *Journal of Materials Chemistry A*. 2021;9(9):5507-21.
- [2] Thaheem I, Kim KJ, Lee JJ, Joh DW, Jeong I, Lee KT. High performance Mn<sub>1.3</sub>Co<sub>1.3</sub>Cu<sub>0.4</sub>O<sub>4</sub> spinel based composite cathodes for intermediate temperature solid oxide fuel cells. *Journal of Materials Chemistry A*. 2019;7(34):19696-703.
- [3] Yun B-H, Kim KJ, Joh DW, Chae MS, Lee JJ, Kim D-w, et al. Highly active and durable double-doped bismuth oxide-based oxygen electrodes for reversible solid oxide cells at reduced temperatures. *Journal of Materials Chemistry A*. 2019;7(36):20558-66.
